# Supplementary material
Source: MDPI journal article supplement (https://www.mdpi.com/2073-4441/12/9/2357)
Supplement: s1 [file s1]

Archive with 3 entries (3 files):
- Simeckova-Water-PAW-DBD-movie.avi
- Simeckova-Water-PAW-R1-supplement.docx
- Simeckova-Water-PAW-R1-supplement.pdf
