# Supplementary material
Source: MDPI journal article supplement (https://www.mdpi.com/2073-4441/12/9/2357)
Supplement: s1 [file s1 › Simeckova-Water-PAW-R1-supplement.docx]

**Kopecky’s rolls**

Kopecky’s rolls (see Fig. S1) are used in pedology for the collecting of non-disturbed soil samples. The rolls are of cylindrical shape with one side in a form of a blade for better penetration into soil. The rolls are used for the measurement of water and air regime and compaction of the soil. The rolls can be of different diameter and height with the same volume of 100 cm3. The bottom side is covered by a fine stainless steel mesh to avoid washing away fine soil particles in case of non-compact soils (see Fig. S2). Photography of the rolls from the experiment presented in this paper is given in Fig. S3. Water absorption and water holding are measured by weighing the rolls placed on a filter paper lying on the tap water reservoir.


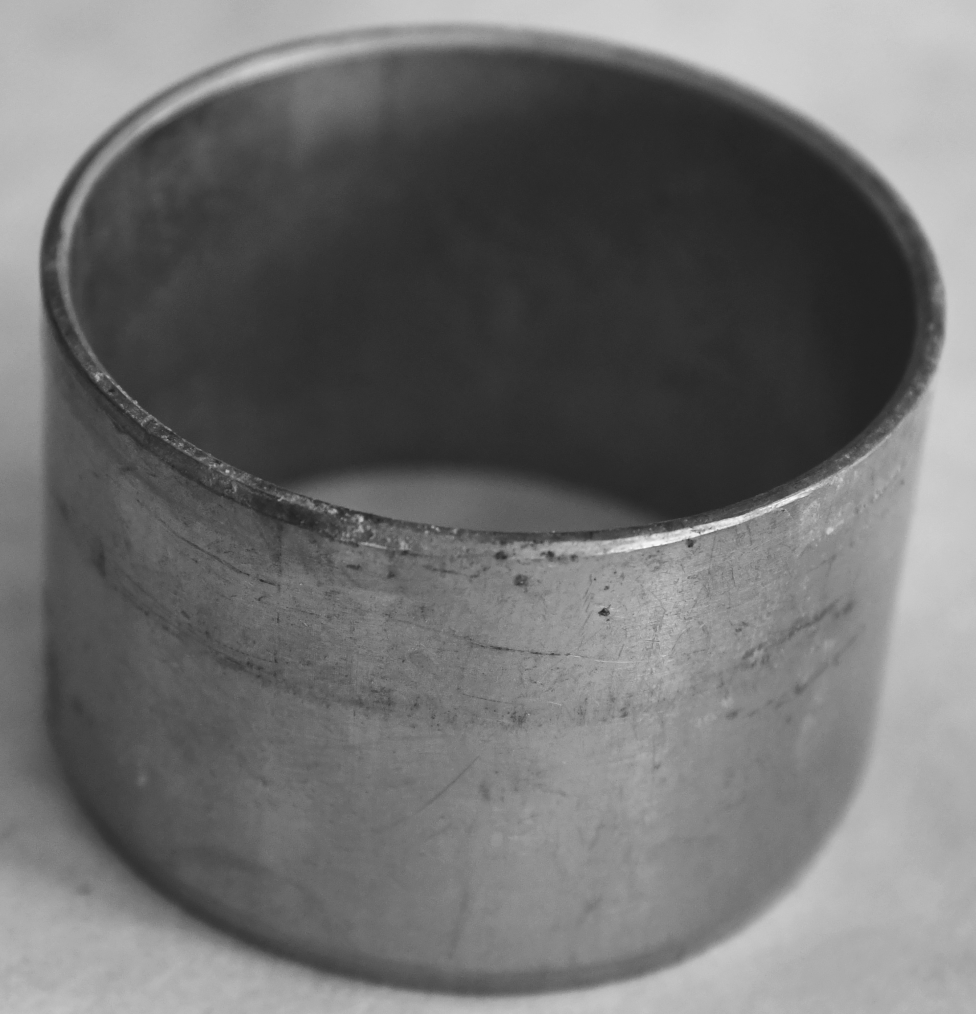

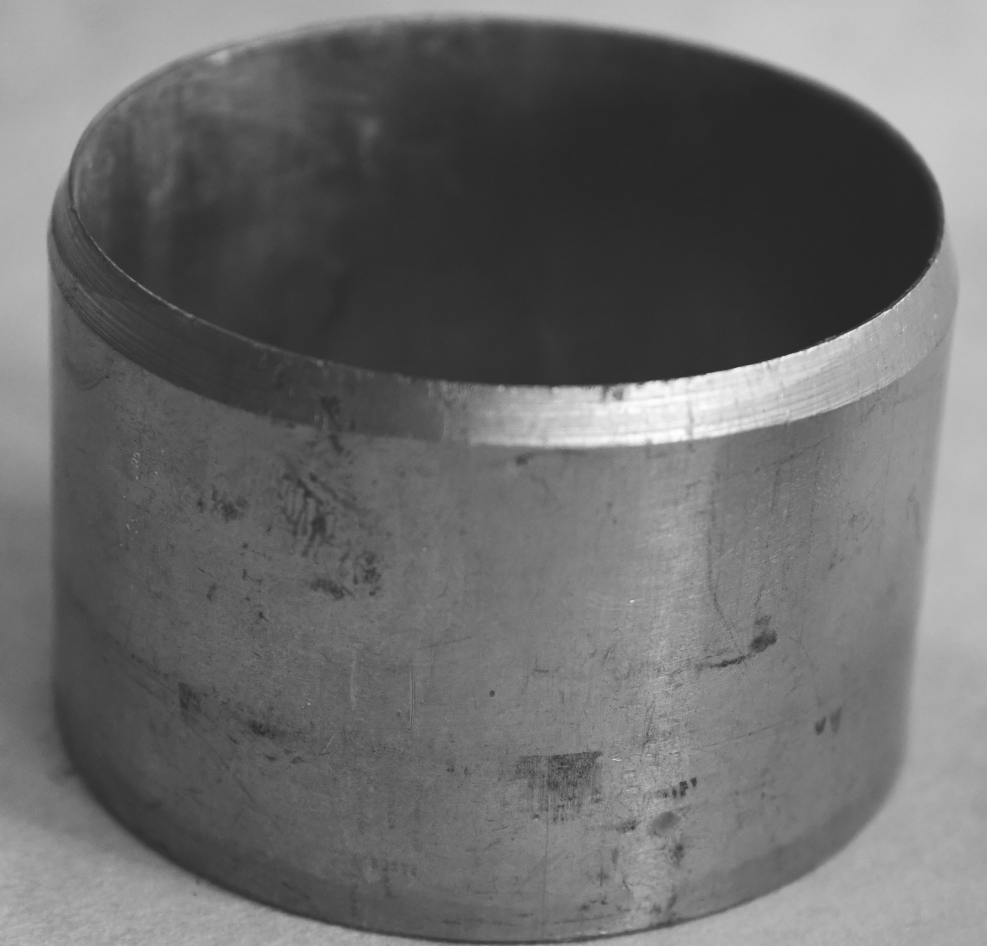


**Figure S1.** Kopecky’s roll used for the current experiment.


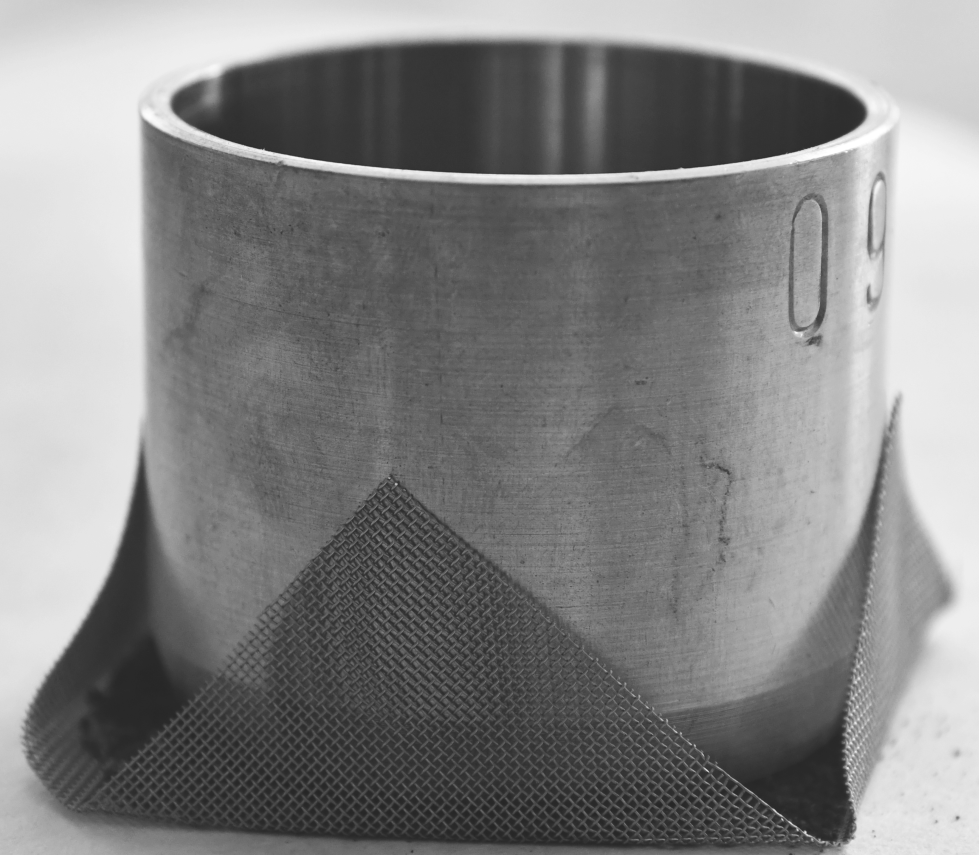


**Figure S2.** Kopecky’s roll with the stainless steel mesh covering its bottom side.


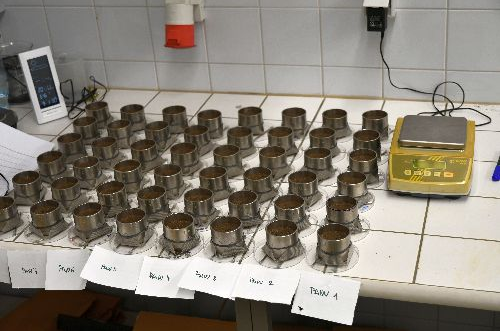


**Figure S3.** Kopecky’s rolls at the beginning of the experiment – a series used for the PAW application.
